# Supplementary material
Source: PubMed Central journal article supplement (PMC5483393)
Supplement: NIHMS863477-supplement.pdf [file NIHMS863477-supplement.pdf]

Distance-dependent effects of motion: Euclidean distance vs. QC-FC correlations  
(264-node Power network)

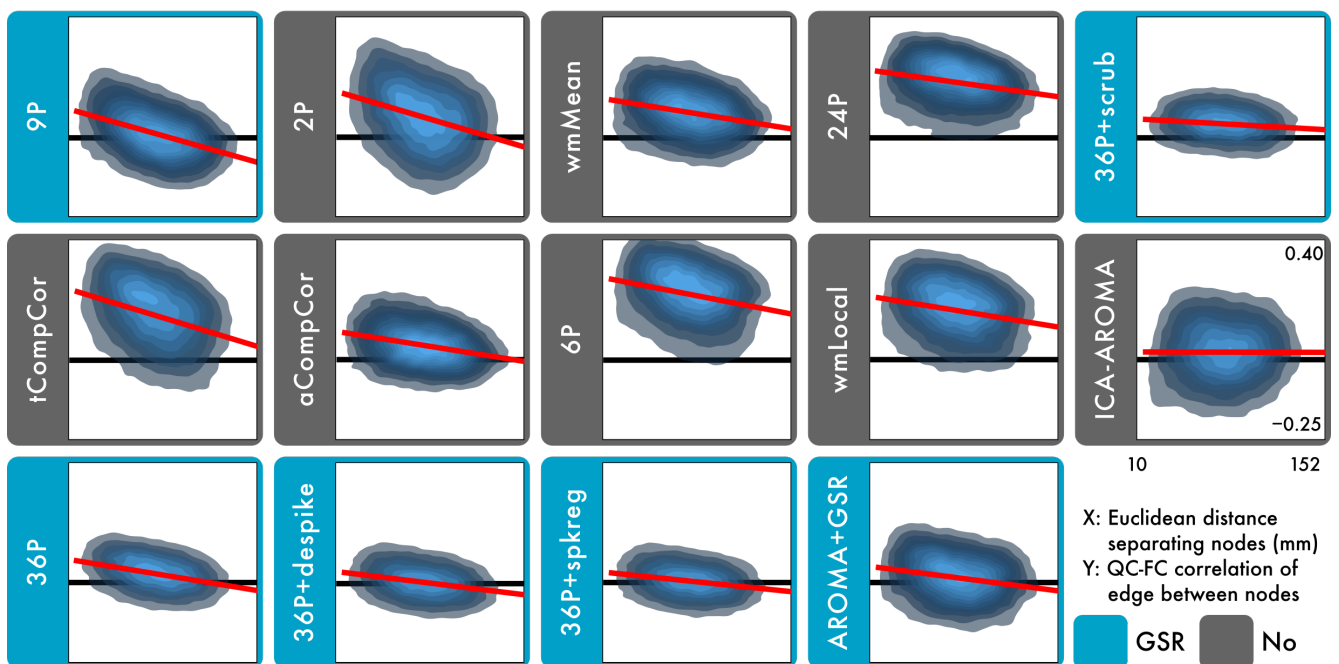

Supplemental Figure 1: **Distance-dependence of motion artifact after de-noising, scaled to a common ordinate for alternative visualisation.** The data from **Figure 4** rescaled to a common ordinate to highlight differences in distribution and slope rather than differences in correlation magnitude. Density plots indicate the relationship between the Euclidean distance separating each pair of nodes (x-axis) and the *QC-FC* correlation of the edge connecting those nodes (y-axis). The overall trend lines for each de-noising strategy, from which distance-dependence is computed, are indicated in red.
